# Supplementary material
Source: PubMed Central journal article supplement (PMC5826164)

Table S1. Source breakdown of carbapenem-resistant *Acinetobacter baumannii* from the Taiwan Surveillance of Antimicrobial

Resistance (TSAR) biennial program by year

| Strata (# of hospitals) | TSAR III |      | TSAR IV |      | TSAR V |      | TSAR VI |      | TSAR VII |      | TSAR III – VII |      |
|-------------------------|----------|------|---------|------|--------|------|---------|------|----------|------|----------------|------|
|                         | (2002)   |      | (2004)  |      | (2006) |      | (2008)  |      | (2010)   |      | combined       |      |
|                         | N        | %    | N       | %    | N      | %    | N       | %    | N        | %    | N              | %    |
| <b>Hospital type</b>    |          |      |         |      |        |      |         |      |          |      |                |      |
| Regional hospitals (15) | 2        | 33.3 | 24      | 53.3 | 61     | 64.9 | 130     | 64.4 | 124      | 59.6 | 341            | 61.4 |
| Medical centers (11)    | 4        | 66.7 | 21      | 46.7 | 33     | 35.1 | 72      | 35.6 | 84       | 40.4 | 214            | 38.6 |
| <b>Region</b>           |          |      |         |      |        |      |         |      |          |      |                |      |
| North (7)               | 2        | 33.3 | 11      | 24.4 | 15     | 16.0 | 39      | 19.3 | 65       | 31.3 | 132            | 23.8 |
| Central (8)             | 0        | 0    | 17      | 37.8 | 33     | 35.1 | 122     | 60.4 | 101      | 48.6 | 273            | 49.2 |
| South (8)               | 0        | 0    | 8       | 17.8 | 24     | 25.5 | 20      | 9.9  | 27       | 13.0 | 79             | 14.2 |
| East (3)                | 4        | 66.7 | 9       | 20.0 | 22     | 23.4 | 21      | 10.4 | 15       | 7.2  | 71             | 12.8 |
| <b>Patient location</b> |          |      |         |      |        |      |         |      |          |      |                |      |
| ICU                     | 1        | 16.7 | 1       | 2.2  | 7      | 7.4  | 9       | 4.5  | 2        | 1.0  | 20             | 3.6  |
| OPD/ER                  | 2        | 33.3 | 26      | 57.8 | 46     | 48.9 | 93      | 46   | 111      | 53.4 | 278            | 50.1 |
| Non-ICU                 | 3        | 50.0 | 18      | 40.0 | 41     | 43.6 | 100     | 49.5 | 95       | 45.7 | 257            | 46.3 |
| <b>Specimen type</b>    |          |      |         |      |        |      |         |      |          |      |                |      |
| Respiratory             | 3        | 50.0 | 32      | 71.1 | 48     | 51.1 | 120     | 59.4 | 127      | 61.1 | 330            | 59.5 |
| Pus/discharge           | 2        | 33.3 | 2       | 4.4  | 15     | 16.0 | 18      | 8.9  | 22       | 10.6 | 59             | 10.6 |
| Blood                   | 0        | 0    | 2       | 4.4  | 5      | 5.3  | 20      | 9.9  | 20       | 9.6  | 47             | 8.5  |
| Urine                   | 0        | 0    | 3       | 6.7  | 16     | 17.0 | 29      | 14.4 | 25       | 12.0 | 73             | 13.2 |
| Others                  | 1        | 16.7 | 6       | 13.3 | 10     | 10.6 | 15      | 7.4  | 14       | 6.7  | 46             | 8.3  |

|                                          |   |      |    |      |    |      |     |      |     |      |     |      |
|------------------------------------------|---|------|----|------|----|------|-----|------|-----|------|-----|------|
| Age group <sup>a</sup>                   |   |      |    |      |    |      |     |      |     |      |     |      |
| Pediatrics                               | 0 | 0    | 2  | 4.4  | 0  | 0    | 2   | 1.0  | 7   | 3.4  | 11  | 2.0  |
| Adult                                    | 2 | 33.3 | 11 | 24.4 | 27 | 28.7 | 37  | 18.3 | 63  | 30.3 | 140 | 25.2 |
| Elderly                                  | 4 | 66.7 | 31 | 68.9 | 67 | 71.3 | 146 | 72.3 | 135 | 64.9 | 383 | 69.0 |
| Class D carbapenemase genes <sup>b</sup> |   |      |    |      |    |      |     |      |     |      |     |      |
| <i>ISAbal-bla</i> <sub>OXA-51-like</sub> | 6 | 100  | 45 | 100  | 81 | 86.2 | 62  | 30.7 | 33  | 15.9 | 227 | 40.9 |
| <i>bla</i> <sub>OXA-23-like</sub>        | 0 | 0    | 0  | 0    | 4  | 4.3  | 124 | 61.4 | 164 | 78.8 | 292 | 52.6 |
| <i>bla</i> <sub>OXA-24-like</sub>        | 0 | 0    | 0  | 0    | 8  | 8.5  | 18  | 8.9  | 33  | 15.9 | 59  | 10.6 |
| <i>bla</i> <sub>OXA-58-like</sub>        | 0 | 0    | 1  | 2.2  | 0  | 0    | 4   | 2.0  | 1   | 0.5  | 6   | 1.1  |

<sup>a</sup>Data on age of some patients were missing

<sup>b</sup>More than one gene of class D carbapenemases were detected in some isolates.

Table S2. Distribution of *bla*<sub>OXA</sub> among 40 carbapenem-resistant *Acinetobacter baumannii*

isolates carrying multiple carbapenem-hydrolyzing class D  $\beta$ -lactamases genes

| Resistance mechanisms                                                                                                | Number |
|----------------------------------------------------------------------------------------------------------------------|--------|
| <i>ISAbal-bla</i> <sub>OXA-51-like</sub> and <i>bla</i> <sub>OXA-23-like</sub>                                       | 23     |
| <i>ISAbal-bla</i> <sub>OXA-51-like</sub> and <i>bla</i> <sub>OXA-24-like</sub>                                       | 8      |
| <i>bla</i> <sub>OXA-23-like</sub> and <i>bla</i> <sub>OXA-24-like</sub>                                              | 4      |
| <i>ISAbal-bla</i> <sub>OXA-51-like</sub> and <i>bla</i> <sub>OXA-58-like</sub>                                       | 4      |
| <i>ISAbal-bla</i> <sub>OXA-51-like</sub> , <i>bla</i> <sub>OXA-23-like</sub> , and <i>bla</i> <sub>OXA-24-like</sub> | 1      |

Table S3. Number (percentage) of class D  $\beta$ -lactamase genes in carbapenem-resistant *A.*

*baumannii* isolates from different regions of Taiwan (as shown in Figure 1)

| Northern                                 | Before 2004<br>N = 13 | 2006<br>N = 15 | 2008<br>N = 39 | 2010<br>N = 65 |
|------------------------------------------|-----------------------|----------------|----------------|----------------|
| <i>ISAbal-bla</i> <sub>OXA-51-like</sub> | 13 (100)              | 15 (100)       | 15 (38)        | 11 (17)        |
| <i>bla</i> <sub>OXA-23-like</sub>        | 0 (0)                 | 0 (0)          | 23 (59)        | 60 (92)        |
| <i>bla</i> <sub>OXA-24-like</sub>        | 0 (0)                 | 0 (0)          | 0 (0)          | 1 (2)          |
| <i>bla</i> <sub>OXA-58-like</sub>        | 0 (0)                 | 0 (0)          | 1 (3)          | 0 (0)          |

  

| Central                                  | Before 2004<br>N = 17 | 2006<br>N = 33 | 2008<br>N = 122 | 2010<br>N = 101 |
|------------------------------------------|-----------------------|----------------|-----------------|-----------------|
| <i>ISAbal-bla</i> <sub>OXA-51-like</sub> | 17 (100)              | 29 (88)        | 26 (21)         | 8 (8)           |
| <i>bla</i> <sub>OXA-23-like</sub>        | 0 (0)                 | 4 (12)         | 97 (80)         | 96 (95)         |
| <i>bla</i> <sub>OXA-24-like</sub>        | 0 (0)                 | 0 (0)          | 1 (1)           | 2 (2)           |
| <i>bla</i> <sub>OXA-58-like</sub>        | 1 (6)                 | 0 (0)          | 3 (2)           | 1 (1)           |

  

| Southern                                 | Before 2004<br>N = 8 | 2006<br>N = 24 | 2008<br>N = 20 | 2010<br>N = 27 |
|------------------------------------------|----------------------|----------------|----------------|----------------|
| <i>ISAbal-bla</i> <sub>OXA-51-like</sub> | 8 (100)              | 15 (63)        | 9 (45)         | 9 (33)         |
| <i>bla</i> <sub>OXA-23-like</sub>        | 0 (0)                | 0 (0)          | 1 (5)          | 4 (15)         |
| <i>bla</i> <sub>OXA-24-like</sub>        | 0 (0)                | 8 (33)         | 10 (50)        | 19 (70)        |
| <i>bla</i> <sub>OXA-58-like</sub>        | 0 (0)                | 0 (0)          | 0 (0)          | 0 (0)          |

  

| Eastern                                  | Before 2004<br>N = 13 | 2006<br>N = 22 | 2008<br>N = 21 | 2010<br>N = 15 |
|------------------------------------------|-----------------------|----------------|----------------|----------------|
| <i>ISAbal-bla</i> <sub>OXA-51-like</sub> | 13 (100)              | 22 (100)       | 12 (57)        | 5 (33)         |
| <i>bla</i> <sub>OXA-23-like</sub>        | 0 (0)                 | 0 (0)          | 3 (14)         | 4 (27)         |
| <i>bla</i> <sub>OXA-24-like</sub>        | 0 (0)                 | 0 (0)          | 7 (33)         | 11 (73)        |
| <i>bla</i> <sub>OXA-58-like</sub>        | 0 (0)                 | 0 (0)          | 0 (0)          | 0 (0)          |

Figure S1. Dendrogram based on pulsed-field gel electrophoresis (PFGE), year of collection, multilocus sequence typing (MLST), and clonal group (CG) of selected carbapenem-resistant *Acinetobacter baumannii* with *bla*<sub>OXA-23-like</sub> (a) or *bla*<sub>OXA-24-like</sub> (b) from the Taiwan Surveillance of Antimicrobial Resistance program, 2002-2010. Pulsotypes were assigned according to the original dendrograms containing 292 and 59 isolates with *bla*<sub>OXA-23-like</sub> and *bla*<sub>OXA-24-like</sub>, respectively. Oth, not belonging to major clusters.

(a)

Dice (Opt:1.00%) (Tol:1.0%-1.0%) (H+:0.0% S+:0.0%) [0.0%-100.0%]  
Apa I 24h 1-30s

Apa I 24h 1-30s

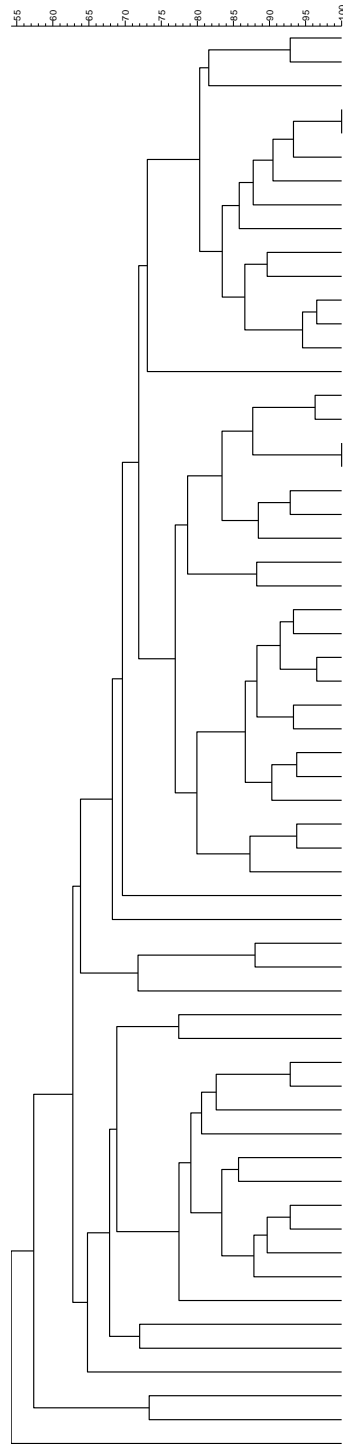

| No   | Year | Pulsotype | ST  | CG  |
|------|------|-----------|-----|-----|
| M169 | 2010 | 23A       | 676 | 92  |
| H055 | 2010 | 23A       | 787 | 92  |
| C161 | 2010 | oth       | 455 | 92  |
| C111 | 2008 | 23A       | 455 | 92  |
| C132 | 2008 | 23A       | 455 | 92  |
| M451 | 2008 | 23A       | 556 | 92  |
| C179 | 2010 | 23A       | 455 | 92  |
| C155 | 2008 | 23A       | 545 | 92  |
| C153 | 2010 | oth       | 791 | NA  |
| M174 | 2008 | 23A       | 556 | 92  |
| C093 | 2008 | 23A       | 473 | 92  |
| M156 | 2008 | 23A       | 556 | 92  |
| M109 | 2008 | 23A       | 556 | 92  |
| C180 | 2008 | 23A       | 556 | 92  |
| T168 | 2010 | oth       | 455 | 92  |
| C066 | 2010 | 23B       | 208 | 92  |
| C159 | 2010 | 23B       | 208 | 92  |
| H051 | 2010 | 23D       | 208 | 92  |
| S074 | 2008 | 23D       | 208 | 92  |
| A175 | 2010 | 23B       | 208 | 92  |
| A096 | 2010 | 23B       | 208 | 92  |
| M062 | 2010 | 23B       | 455 | 92  |
| M166 | 2008 | 23C       | 208 | 92  |
| T101 | 2008 | 23C       | 473 | 92  |
| M134 | 2010 | 23A       | 455 | 92  |
| H107 | 2008 | 23B       | 455 | 92  |
| M099 | 2010 | 23B       | 473 | 92  |
| T068 | 2008 | 23B       | 455 | 92  |
| H132 | 2010 | 23B       | 455 | 92  |
| C174 | 2008 | 23B       | 455 | 92  |
| A407 | 2008 | 23B       | 455 | 92  |
| H156 | 2008 | 23B       | 455 | 92  |
| M155 | 2008 | 23B       | 788 | 92  |
| C027 | 2010 | oth       | 455 | 92  |
| C177 | 2008 | oth       | 350 | 92  |
| C165 | 2010 | oth       | 455 | 92  |
| M174 | 2010 | oth       | 790 | 92  |
| S053 | 2010 | oth       | 473 | 92  |
| M123 | 2010 | 23D       | 436 | 92  |
| M173 | 2010 | 23D       | 208 | 92  |
| M222 | 2010 | oth       | 473 | 92  |
| M202 | 2008 | oth       | 789 | 786 |
| A148 | 2008 | oth       | 550 | 786 |
| C188 | 2010 | 23F       | 685 | 786 |
| T239 | 2008 | 23F       | 685 | 786 |
| C076 | 2010 | 23F       | 792 | 786 |
| M068 | 2010 | oth       | 555 | 786 |
| C053 | 2008 | 23E       | 555 | 786 |
| H114 | 2008 | oth       | 786 | 786 |
| C128 | 2006 | 23E       | 786 | 786 |
| C173 | 2008 | 23E       | 786 | 786 |
| C162 | 2006 | 23E       | 786 | 786 |
| T054 | 2008 | 23E       | 786 | 786 |
| H081 | 2010 | oth       | 555 | 786 |
| M164 | 2010 | oth       | 555 | 786 |
| T152 | 2010 | oth       | 551 | 786 |
| H092 | 2010 | oth       | 544 | 92  |
| T076 | 2010 | oth       | 687 | NA  |
| T218 | 2008 | oth       | 687 | NA  |
| C141 | 2010 | oth       | 208 | 92  |

(b)

Dice (Opt:1.00%) (Tot 1.0%-1.0%) (H>0.0% S>0.0%) [0.0%-100.0%]  
**Apa I 24h 1-30s**

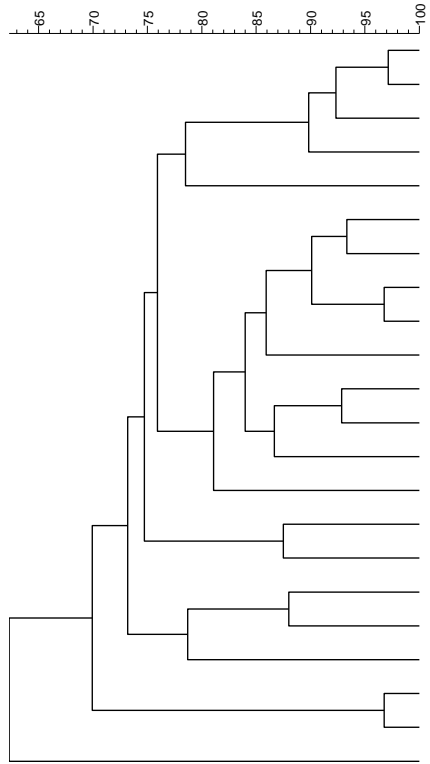

**Apa I 24h 1-30s**

| No   | Year | Pulsotype | ST  | CG |
|------|------|-----------|-----|----|
| S082 | 2006 | 24B       | 218 | 92 |
| S090 | 2008 | 24B       | 218 | 92 |
| L015 | 2008 | 24B       | 218 | 92 |
| S120 | 2006 | 24B       | 218 | 92 |
| S081 | 2010 | oth       | 684 | 92 |
| P194 | 2010 | 24A       | 218 | 92 |
| K163 | 2008 | 24A       | 218 | 92 |
| K122 | 2010 | 24A       | 218 | 92 |
| K089 | 2010 | 24A       | 218 | 92 |
| H173 | 2010 | 24A       | 218 | 92 |
| L145 | 2010 | 24A       | 473 | 92 |
| M180 | 2010 | 24A       | 218 | 92 |
| K179 | 2008 | 24B       | 208 | 92 |
| M179 | 2008 | 24A       | 208 | 92 |
| S086 | 2010 | oth       | 473 | 92 |
| K073 | 2006 | oth       | 787 | 92 |
| H151 | 2006 | oth       | 473 | 92 |
| S101 | 2006 | oth       | 218 | 92 |
| S136 | 2010 | oth       | 436 | 92 |
| L157 | 2008 | 24C       | 686 | 92 |
| K069 | 2008 | 24C       | 686 | 92 |
| P152 | 2010 | oth       | 793 | 92 |

Figure S2. Localization and genetic environments of *bla*<sub>OXA-23-like</sub> in *Acinetobacter baumannii*. The S1 nuclease assay (a) and I-CeuI assay (b) showed simultaneous localization of *bla*<sub>OXA-23-like</sub> in the plasmids and chromosome in some isolates. In figure (b), left panel represents hybridization with 23S rRNA genes and right panel, hybridization with *bla*<sub>OXA-23-like</sub>. (c) PCR mapping showing *bla*<sub>OXA-23-like</sub> carried by two subtypes of AbGRII. More than one AbGRII subtypes may be present in each isolate. Only the results of 20 isolates are presented.

(a)

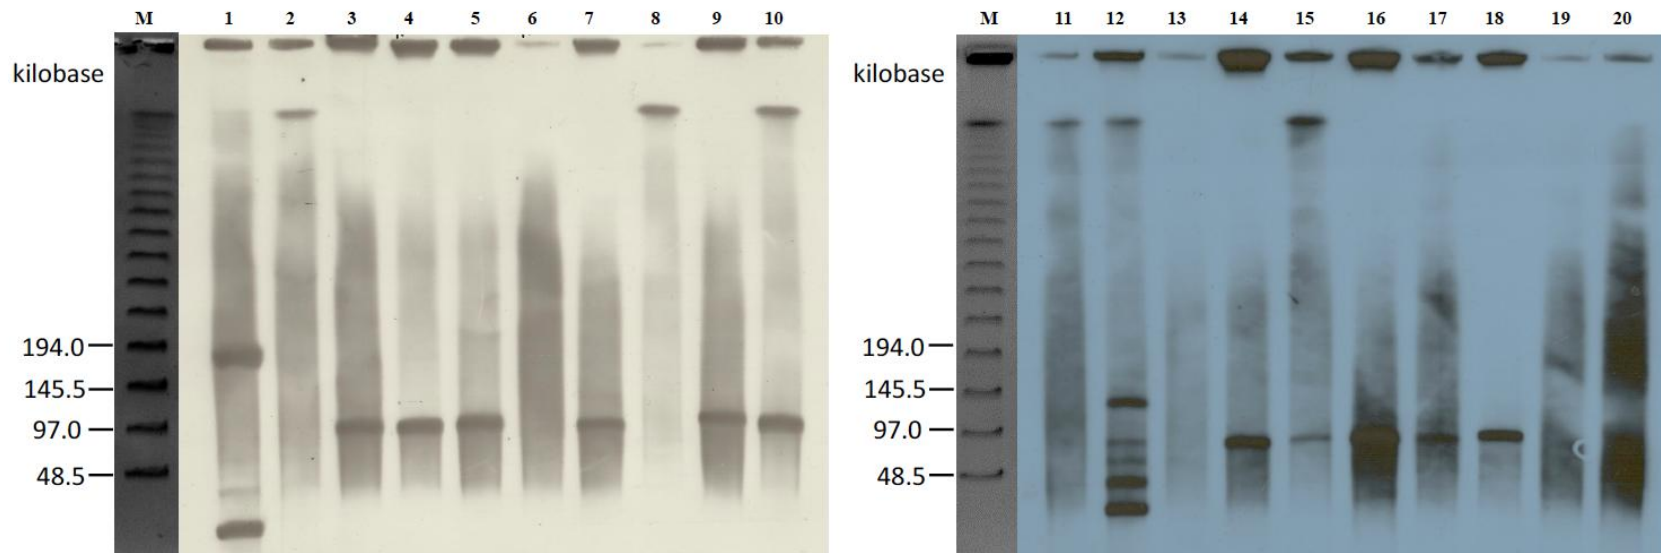



(b)

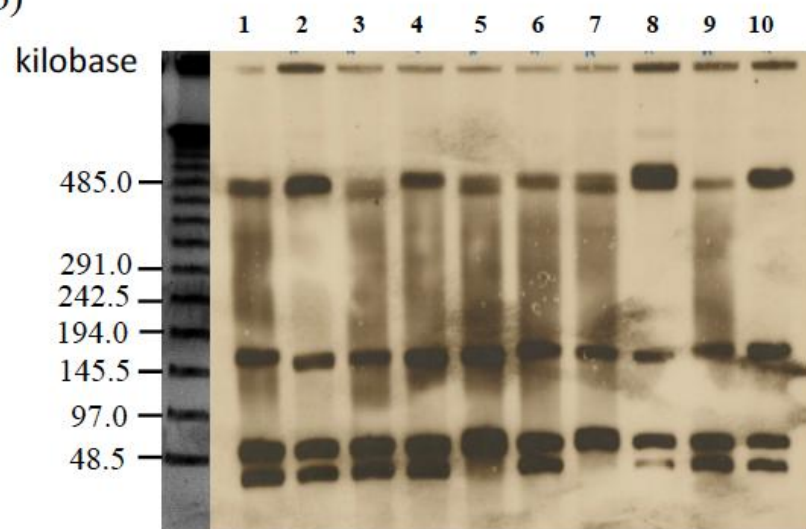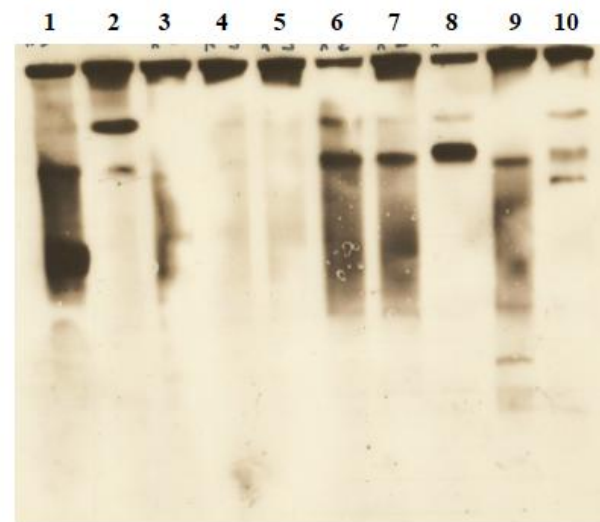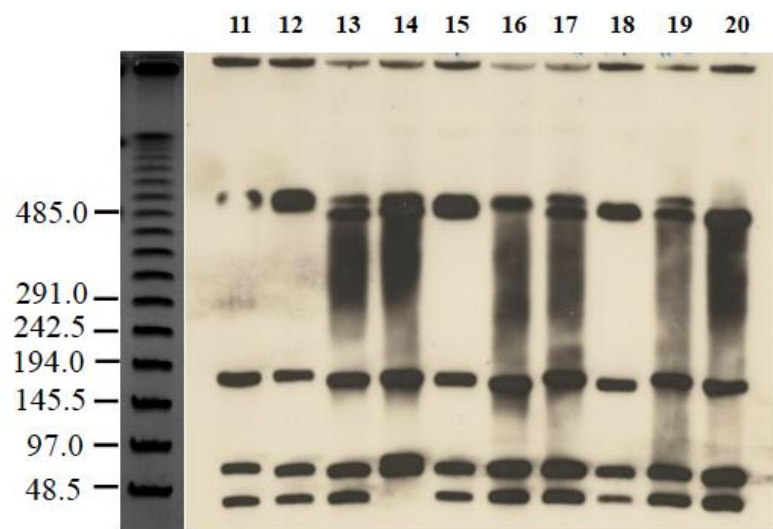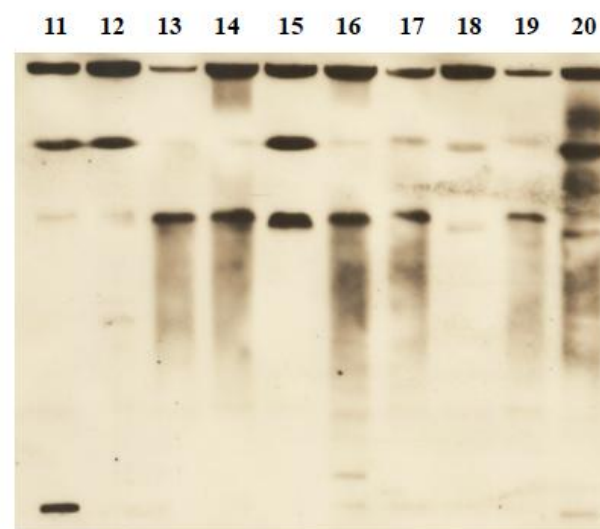

(c)

Tn6166 ( $\Delta tniD$ )

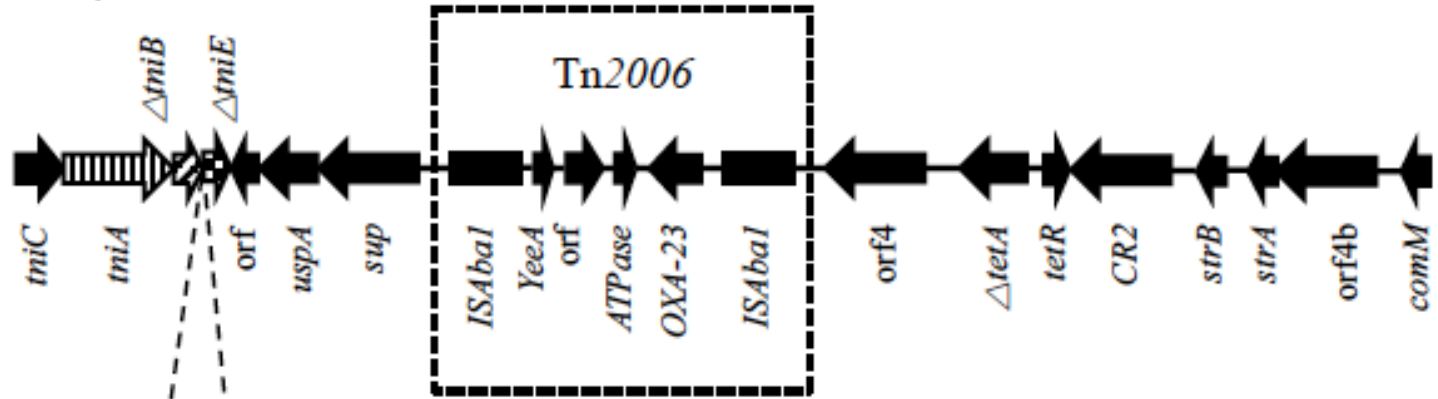

Tn6166 (*tniD*)

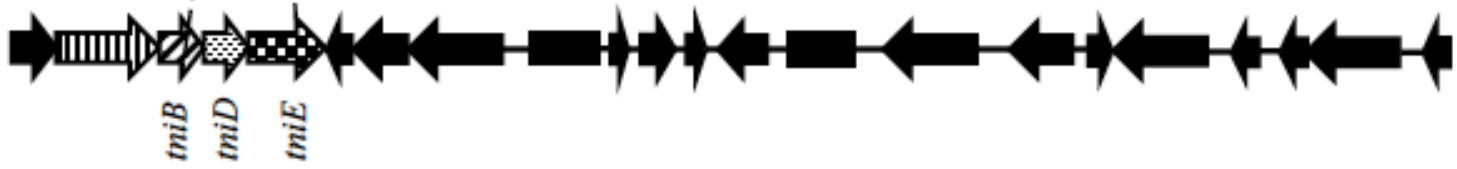



Figure S4. Flow chart of isolate selection and experiments performed in this study.

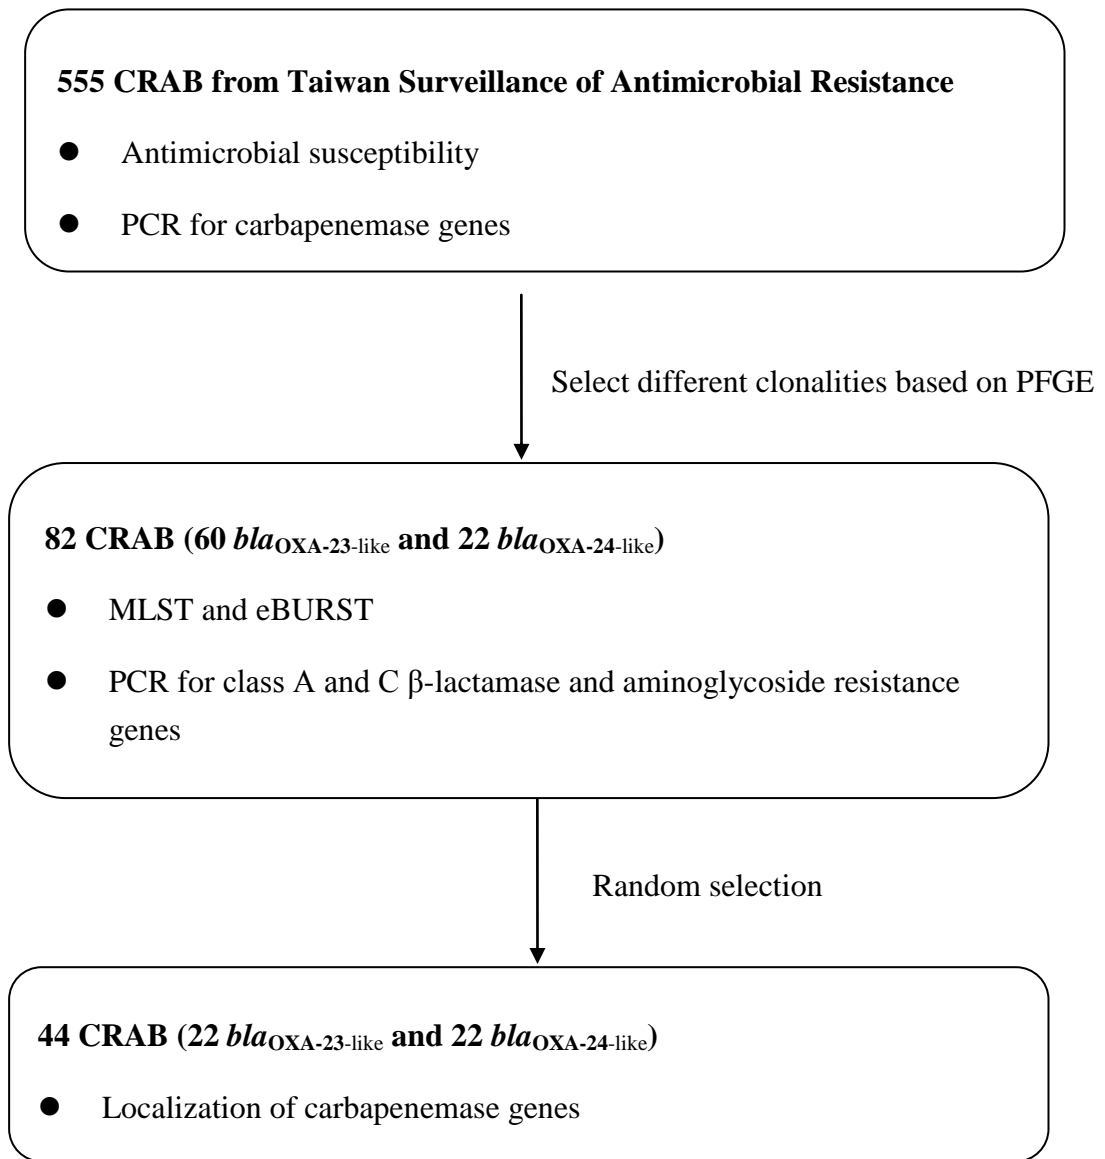

Supplement: AAC.01215-17_zac003186950s1.pdf [file AAC.01215-17_zac003186950s1.pdf]
